# Supplementary material for: Controllable synthesis of platinum diselenide (PtSe2) inorganic fullerene
Source: Royal Society of Chemistry journal article supplement (doi:10.1039/d0ta06846b), 2020-01-01
Supplement: d0ta06846b1.pdf [file d0ta06846b1.pdf]

## Electronic Supplementary Information (ESI)

### Controllable Synthesis of Platinum Diselenide (PtSe<sub>2</sub>) Inorganic Fullerene

Mengjing Wang,<sup>a</sup> Mashiyat Sumaiya Shawkat,<sup>a,b</sup> Zheng Xi,<sup>c</sup> Xiaohu Xia,<sup>c</sup> Kyu Seung Lee,<sup>d</sup> Dong Ick Son,<sup>d</sup> Tae-Sung Bae,<sup>e</sup> Hyeon Ih Ryu,<sup>e</sup> Hee-Suk Chung,<sup>e\*</sup> and Yeonwoong Jung,<sup>a,b,f,\*</sup>

---

<sup>a</sup> NanoScience Technology Center, University of Central Florida, Orlando, Florida 32826, United States Email: yeonwoong.jung@ucf.edu

<sup>b</sup> Department of Electrical and Computer Engineering, University of Central Florida, Orlando, Florida 32826, United States

<sup>c</sup> Department of Chemistry, University of Central Florida, Orlando, Florida 32826, United States

<sup>d</sup> Institute of Advanced Composite Materials, Korea Institute of Science and Technology, Jeonbuk 55324, South Korea

<sup>e</sup> Analytical Research Division, Korea Basic Science Institute, Jeonju 54907, South Korea Email: hschung13@kbsi.re.kr

<sup>f</sup> Department of Materials Science and Engineering, University of Central Florida, Orlando, Florida 32826, United States

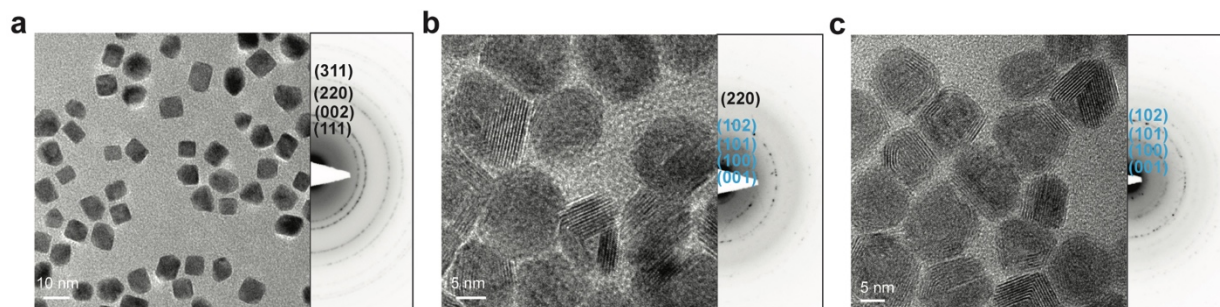

**Figure S1.** TEM image and SAED patterns of Pt nanocubes before (a) and after selenization for 5 min (b), 50 mins (c). Blue index denotes diffraction from PtSe<sub>2</sub>, and black index denotes diffraction from Pt.

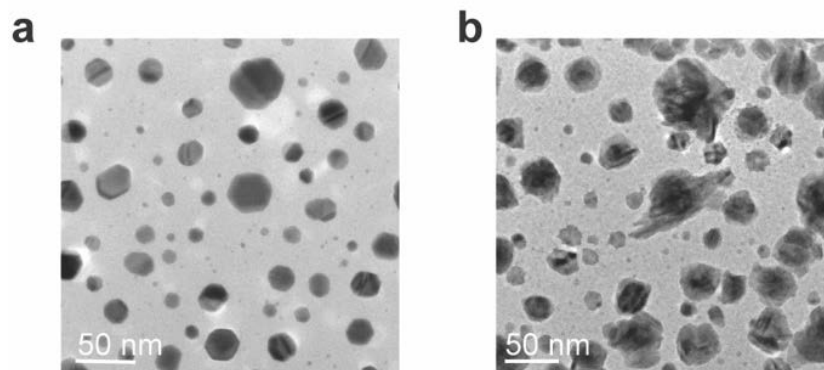

**Figure S2.** TEM image of annealed  $\sim 0.5$  nm Pt film on silicon nitride TEM grid before (a) and after (b) selenization.

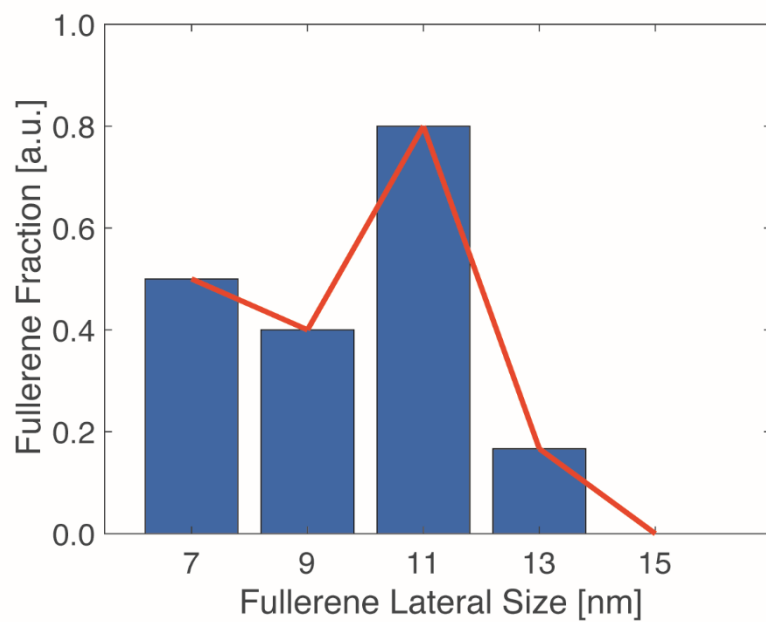

**Figure S3.** Histogram to show the fraction of fullerenes as a function of their lateral dimension.
